# Supplementary material
Source: PubMed Central journal article supplement (PMC3108804)

# SUPPLEMENTARY DATA

FIG. S1. Amino acid alignment of AG orthologues from taxa across the angiosperms. Sequence names and accession numbers of protein sequences used in the alignment are given in the table below.

|           |      | MADS |   |   |   |   |   |   |   |   |   | I |   |   |   |   |   |   |   |   |   |   |   |   |   |   |   |   |   |   |   |   |   |   |   |   |   |   |   |   |   |   |   |   |   |   |   |   |   |   |   |   |   |   |   |   |
|-----------|------|------|---|---|---|---|---|---|---|---|---|---|---|---|---|---|---|---|---|---|---|---|---|---|---|---|---|---|---|---|---|---|---|---|---|---|---|---|---|---|---|---|---|---|---|---|---|---|---|---|---|---|---|---|---|---|
| TaAGL2    | MRGR | I    | K | R | E | N | T | S | R | Q | V | T | S | C | K | R | R | N | G | L | K | K | A | Y | E | L | S | V | L | C | D | E | A | V | I | V | F | S | S | R | G | R | L | Y | E | S | N | S | V | K | A | T | I | D | R | Y |
| TaAG3b    | MRGR | I    | K | R | E | N | T | S | R | Q | V | T | S | C | K | R | R | N | G | L | K | K | A | Y | E | L | S | V | L | C | D | E | A | V | I | V | F | S | S | R | G | R | L | Y | E | S | N | S | V | K | A | T | I | D | R | Y |
| TaAGL31   | MRGR | I    | K | R | E | N | T | S | R | Q | V | T | S | C | K | R | R | N | G | L | K | K | A | Y | E | L | S | V | L | C | D | E | A | V | I | V | F | S | S | R | G | R | L | Y | E | S | N | S | V | K | A | T | I | D | R | Y |
| OsMADS13  | MRGR | I    | K | R | E | N | T | S | R | Q | V | T | S | C | K | R | R | N | G | L | K | K | A | Y | E | L | S | V | L | C | D | E | A | V | I | V | F | S | S | R | G | R | L | Y | E | S | N | S | V | K | A | T | I | D | R | Y |
| ZMH1      | MRGR | I    | K | R | E | N | T | S | R | Q | V | T | S | C | K | R | R | N | G | L | K | K | A | Y | E | L | S | V | L | C | D | E | A | V | I | V | F | S | S | R | G | R | L | Y | E | S | N | S | V | K | A | T | I | D | R | Y |
| ZAG2      | MRGR | I    | K | R | E | N | T | S | R | Q | V | T | S | C | K | R | R | N | G | L | K | K | A | Y | E | L | S | V | L | C | D | E | A | V | I | V | F | S | S | R | G | R | L | Y | E | S | N | S | V | K | A | T | I | D | R | Y |
| OsMADS21  | MRGR | I    | K | R | E | N | T | S | R | Q | V | T | S | C | K | R | R | N | G | L | K | K | A | Y | E | L | S | V | L | C | D | E | A | V | I | V | F | S | S | R | G | R | L | Y | E | S | N | S | V | K | A | T | I | D | R | Y |
| ZMH29     | MRGR | I    | K | R | E | N | T | S | R | Q | V | T | S | C | K | R | R | N | G | L | K | K | A | Y | E | L | S | V | L | C | D | E | A | V | I | V | F | S | S | R | G | R | L | Y | E | S | N | S | V | K | A | T | I | D | R | Y |
| TaAG4b    | MRGR | I    | K | R | E | N | T | S | R | Q | V | T | S | C | K | R | R | N | G | L | K | K | A | Y | E | L | S | V | L | C | D | E | A | V | I | V | F | S | S | R | G | R | L | Y | E | S | N | S | V | K | A | T | I | D | R | Y |
| TaAG4a    | MRGR | I    | K | R | E | N | T | S | R | Q | V | T | S | C | K | R | R | N | G | L | K | K | A | Y | E | L | S | V | L | C | D | E | A | V | I | V | F | S | S | R | G | R | L | Y | E | S | N | S | V | K | A | T | I | D | R | Y |
| EscaAGL11 | MRGR | I    | K | R | E | N | T | S | R | Q | V | T | S | C | K | R | R | N | G | L | K | K | A | Y | E | L | S | V | L | C | D | E | A | V | I | V | F | S | S | R | G | R | L | Y | E | S | N | S | V | K | A | T | I | D | R | Y |
| STK       | MRGR | I    | K | R | E | N | T | S | R | Q | V | T | S | C | K | R | R | N | G | L | K | K | A | Y | E | L | S | V | L | C | D | E | A | V | I | V | F | S | S | R | G | R | L | Y | E | S | N | S | V | K | A | T | I | D | R | Y |
| FBP11     | MRGR | I    | K | R | E | N | T | S | R | Q | V | T | S | C | K | R | R | N | G | L | K | K | A | Y | E | L | S | V | L | C | D | E | A | V | I | V | F | S | S | R | G | R | L | Y | E | S | N | S | V | K | A | T | I | D | R | Y |
| TaGL11    | MRGR | I    | K | R | E | N | T | S | R | Q | V | T | S | C | K | R | R | N | G | L | K | K | A | Y | E | L | S | V | L | C | D | E | A | V | I | V | F | S | S | R | G | R | L | Y | E | S | N | S | V | K | A | T | I | D | R | Y |
| FBP7      | MRGR | I    | K | R | E | N | T | S | R | Q | V | T | S | C | K | R | R | N | G | L | K | K | A | Y | E | L | S | V | L | C | D | E | A | V | I | V | F | S | S | R | G | R | L | Y | E | S | N | S | V | K | A | T | I | D | R | Y |
| WAG1      | MRGR | I    | K | R | E | N | T | S | R | Q | V | T | S | C | K | R | R | N | G | L | K | K | A | Y | E | L | S | V | L | C | D | E | A | V | I | V | F | S | S | R | G | R | L | Y | E | S | N | S | V | K | A | T | I | D | R | Y |
| HuAG2     | MRGR | I    | K | R | E | N | T | S | R | Q | V | T | S | C | K | R | R | N | G | L | K | K | A | Y | E | L | S | V | L | C | D | E | A | V | I | V | F | S | S | R | G | R | L | Y | E | S | N | S | V | K | A | T | I | D | R | Y |
| OsMADS58  | MRGR | I    | K | R | E | N | T | S | R | Q | V | T | S | C | K | R | R | N | G | L | K | K | A | Y | E | L | S | V | L | C | D | E | A | V | I | V | F | S | S | R | G | R | L | Y | E | S | N | S | V | K | A | T | I | D | R | Y |
| ZAG1      | MRGR | I    | K | R | E | N | T | S | R | Q | V | T | S | C | K | R | R | N | G | L | K | K | A | Y | E | L | S | V | L | C | D | E | A | V | I | V | F | S | S | R | G | R | L | Y | E | S | N | S | V | K | A | T | I | D | R | Y |
| ZMH2      | MRGR | I    | K | R | E | N | T | S | R | Q | V | T | S | C | K | R | R | N | G | L | K | K | A | Y | E | L | S | V | L | C | D | E | A | V | I | V | F | S | S | R | G | R | L | Y | E | S | N | S | V | K | A | T | I | D | R | Y |
| OsMADS3   | MRGR | I    | K | R | E | N | T | S | R | Q | V | T | S | C | K | R | R | N | G | L | K | K | A | Y | E | L | S | V | L | C | D | E | A | V | I | V | F | S | S | R | G | R | L | Y | E | S | N | S | V | K | A | T | I | D | R | Y |
| HuAG1     | MRGR | I    | K | R | E | N | T | S | R | Q | V | T | S | C | K | R | R | N | G | L | K | K | A | Y | E | L | S | V | L | C | D | E | A | V | I | V | F | S | S | R | G | R | L | Y | E | S | N | S | V | K | A | T | I | D | R | Y |
| ZMH23     | MRGR | I    | K | R | E | N | T | S | R | Q | V | T | S | C | K | R | R | N | G | L | K | K | A | Y | E | L | S | V | L | C | D | E | A | V | I | V | F | S | S | R | G | R | L | Y | E | S | N | S | V | K | A | T | I | D | R | Y |
| SHP1      | MRGR | I    | K | R | E | N | T | S | R | Q | V | T | S | C | K | R | R | N | G | L | K | K | A | Y | E | L | S | V | L | C | D | E | A | V | I | V | F | S | S | R | G | R | L | Y | E | S | N | S | V | K | A | T | I | D | R | Y |
| SHP2      | MRGR | I    | K | R | E | N | T | S | R | Q | V | T | S | C | K | R | R | N | G | L | K | K | A | Y | E | L | S | V | L | C | D | E | A | V | I | V | F | S | S | R | G | R | L | Y | E | S | N | S | V | K | A | T | I | D | R | Y |
| AmPLE     | MRGR | I    | K | R | E | N | T | S | R | Q | V | T | S | C | K | R | R | N | G | L | K | K | A | Y | E | L | S | V | L | C | D | E | A | V | I | V | F | S | S | R | G | R | L | Y | E | S | N | S | V | K | A | T | I | D | R | Y |
| TaGL1     | MRGR | I    | K | R | E | N | T | S | R | Q | V | T | S | C | K | R | R | N | G | L | K | K | A | Y | E | L | S | V | L | C | D | E | A | V | I | V | F | S | S | R | G | R | L | Y | E | S | N | S | V | K | A | T | I | D | R | Y |
| AmFAR     | MRGR | I    | K | R | E | N | T | S | R | Q | V | T | S | C | K | R | R | N | G | L | K | K | A | Y | E | L | S | V | L | C | D | E | A | V | I | V | F | S | S | R | G | R | L | Y | E | S | N | S | V | K | A | T | I | D | R | Y |
| TAG1      | MRGR | I    | K | R | E | N | T | S | R | Q | V | T | S | C | K | R | R | N | G | L | K | K | A | Y | E | L | S | V | L | C | D | E | A | V | I | V | F | S | S | R | G | R | L | Y | E | S | N | S | V | K | A | T | I | D | R | Y |
| AG        | MRGR | I    | K | R | E | N | T | S | R | Q | V | T | S | C | K | R | R | N | G | L | K | K | A | Y | E | L | S | V | L | C | D | E | A | V | I | V | F | S | S | R | G | R | L | Y | E | S | N | S | V | K | A | T | I | D | R | Y |
| PapsAG1   | MRGR | I    | K | R | E | N | T | S | R | Q | V | T | S | C | K | R | R | N | G | L | K | K | A | Y | E | L | S | V | L | C | D | E | A | V | I | V | F | S | S | R | G | R | L | Y | E | S | N | S | V | K | A | T | I | D | R | Y |
| PapsAG2   | MRGR | I    | K | R | E | N | T | S | R | Q | V | T | S | C | K | R | R | N | G | L | K | K | A | Y | E | L | S | V | L | C | D | E | A | V | I | V | F | S | S | R | G | R | L | Y | E | S | N | S | V | K | A | T | I | D | R | Y |
| EscaAG1   | MRGR | I    | K | R | E | N | T | S | R | Q | V | T | S | C | K | R | R | N | G | L | K | K | A | Y | E | L | S | V | L | C | D | E | A | V | I | V | F | S | S | R | G | R | L | Y | E | S | N | S | V | K | A | T | I | D | R | Y |
| EscaAG2   | MRGR | I    | K | R | E | N | T | S | R | Q | V | T | S | C | K | R | R | N | G | L | K | K | A | Y | E | L | S | V | L | C | D | E | A | V | I | V | F | S | S | R | G | R | L | Y | E | S | N | S | V | K | A | T | I | D | R | Y |

Sequence name and accession numbers of protein sequences used in the alignment

| Gene annotation | Source                          | Genbank Accession |
|-----------------|---------------------------------|-------------------|
| TaAGL2          | <i>Triticum aestivum</i>        | DQ512337          |
| TaAG3b          | <i>Triticum aestivum</i>        | AM502865          |
| TaAGL31         | <i>Triticum aestivum</i>        | ABF57933          |
| OsMADS13        | <i>Oryza sativa</i>             | AF151693          |
| ZMM1            | <i>Zea mays</i>                 | X81199            |
| ZAG2            | <i>Zea mays</i>                 | L18925            |
| OsMADS21        | <i>Oryza sativa</i>             | Q8RU31            |
| ZMM25           | <i>Zea mays</i>                 | AJ430639          |
| TaAG4b          | <i>Triticum aestivum</i>        | AM502895          |
| TaAG4a          | <i>Triticum aestivum</i>        | AM502894          |
| EScaAGL11       | <i>Eschscholzia californica</i> | DQ088998          |
| STK             | <i>Arabidopsis thaliana</i>     | U20182            |
| FBP11           | <i>Petunia hybrida</i>          | X81852            |
| TAGL11          | <i>Solanum lycopersicum</i>     | AY098736          |
| FBP7            | <i>Petunia hybrida</i>          | X81651            |
| WAG1            | <i>Triticum aestivum</i>        | AT1G53700         |
| HvAG2           | <i>Hordeum vulgare</i>          | AF486649          |
| OsMADS58        | <i>Oryza sativa</i>             | AB232157          |
| ZAG1            | <i>Zea mays</i>                 | L18924            |
| ZMM2            | <i>Zea mays</i>                 | X81200            |
| ZmAG            | <i>Zea mays</i>                 | L81162            |
| OsMADS3         | <i>Oryza sativa</i>             | L37528            |
| HvAG1           | <i>Hordeum vulgare</i>          | AF486648          |
| ZmM23           | <i>Zea mays</i>                 | AJ430637          |
| SHP1            | <i>Arabidopsis thaliana</i>     | M55550            |
| SHP2            | <i>Arabidopsis thaliana</i>     | M55553            |
| AmPLE           | <i>Antirrhinum majus</i>        | S53900            |
| TAGL1           | <i>Solanum lycopersicum</i>     | AY098735          |
| AmFAR           | <i>Antirrhinum majus</i>        | AJ239057          |
| TAG1            | <i>Solanum lycopersicum</i>     | L26295            |
| AG              | <i>Arabidopsis thaliana</i>     | X53579            |
| PapsAG1         | <i>Papaver somniferum</i>       | GU123602          |
| PapsAG2         | <i>Papaver somniferum</i>       | GU123603          |
| EScaAG1         | <i>Eschscholzia californica</i> | DQ088996          |
| EScaAG2         | <i>Eschscholzia californica</i> | DQ088997          |



FIG. S3. mRNA ISH of (A) *PapsAG-1* and (B–D) *PapsAG-2* at stages P5 (A, B), P6 (C) and P7 (D). Other than *PapsAG-2* expression in the petal at stage P5 there were no differences in expression observed between the two transcripts. Abbreviations: pe, petals; se, septae. Scale bars = 200  $\mu$ m.

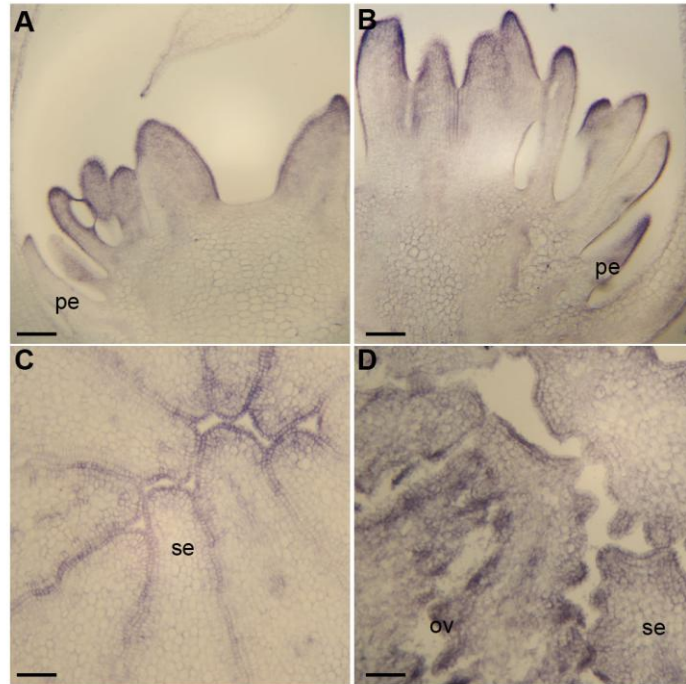

FIG. S4. mRNA ISH with *PapsH4-1* (A, B) and with sense probes for *PapsAG-1* (C) and *PapsAG-2* (D). Scale bars = 200  $\mu$ m.

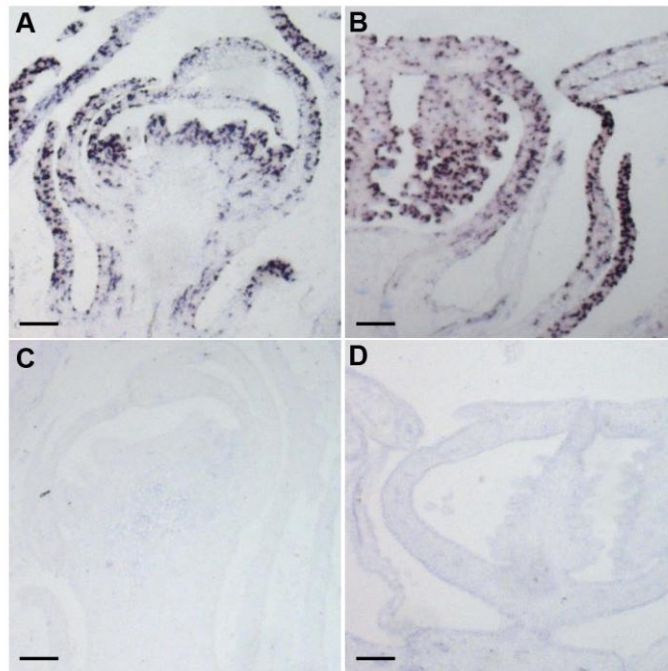

FIG. S5. Empty TRV2 vector control results at pendant (A) and mature flower stages (B, C); scale bars = 2 mm. RT-PCR expression analysis of four lines (D).

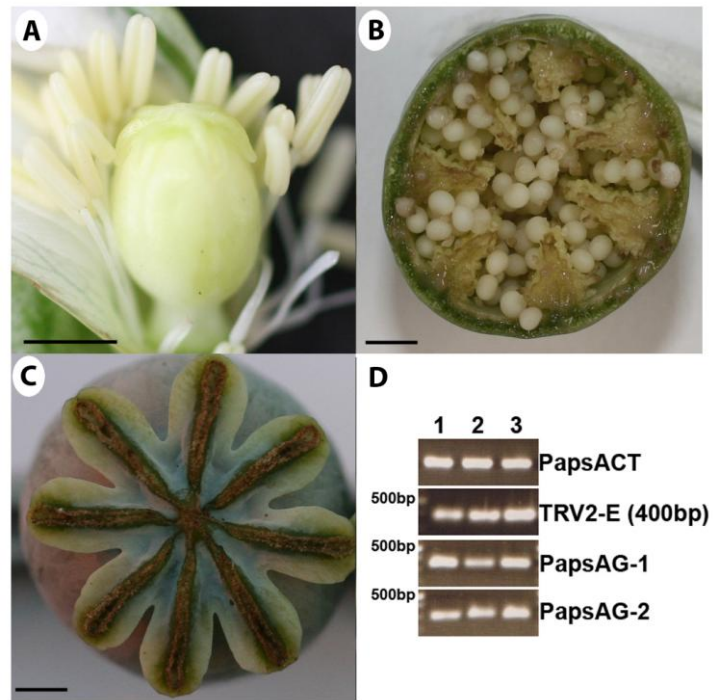

Supplement: supp_mcr045_mcr045supp.pdf [file supp_mcr045_mcr045supp.pdf]
